# Supplementary material for: Differential Genetic and Epigenetic Effects of the KLF14 Gene on Body Shape Indices and Metabolic Traits
Source: MDPI journal article supplement (doi:10.3390/ijms23084165), 2022-04-09

## **Supplementary materials**

### **Supplementary Method**

- (1) Definitions of hypertension, diabetes mellitus, obesity, current smoking, and metabolic syndrome*
- (2) Measurement of body fat percentage (BFP)*
- (3) Formulas for body-shape indices: a body-shape index (ABSI), hip index (HI) and waist hip index (WHI)*
- (4) Formulas for the product of triglyceride and fasting plasma glucose (the TyG index), TyG with adiposity status (TyG-body mass index [BMI] and TyG waist circumference)*

**Supplementary Table 1.** Association between *KLF14* rs4731702 genotypes and body-shape indices and metabolic traits in Taiwan Biobank participants

**Supplementary Table 2.** Association between *KLF14* rs4731702 genotypes and body-shape indices and metabolic traits according to obesity status

**Supplementary Table 3.** Association between *KLF14* rs4731702 genotypes and body-shape indices and metabolic traits according to obesity status in male participants

**Supplementary Table 4.** Association between *KLF14* DNA methylation status and *KLF14* variants and body-shape indices and metabolic traits

**Supplementary Table 5.** Association of the cg08097417 methylation status with body-shape indices and metabolic traits according to sex

**Supplementary Table 6.** Association of the cg08097417 methylation status with body-shape indices and metabolic traits according to obesity status

**Supplementary Table 7.** Association between *KLF14* rs4731702 genotypes and cg08097417 methylation status and metabolically healthy and unhealthy phenotypes in obese Taiwan Biobank participants

**Supplementary Figure 1.** Regional association studies for genetic variants at positions between 130.3 to 130.5 mega-base on chromosome 7q32.2 for HDL-cholesterol levels.

**Supplementary Figure 2.** Regional association studies for genetic variants at positions between 130.3 to 130.5 mega-base on chromosome 7q32.2 for triglyceride levels.

**Supplementary Figure 3.** Regional association studies for genetic variants at positions between 130.3 to 130.5 mega-base on chromosome 7q32.2 for mean blood pressure.

**Supplementary Figure 4.** Regional association studies for genetic variants at positions between 130.3 to 130.5 mega-base on chromosome 7q32.2 for metabolic syndrome.

**Supplementary Figure 5.** Regional association studies for genetic variants at positions between 130.3 to 130.5 mega-base on chromosome 7q32.2 for body mass index.

**Supplementary Figure 6.** Regional association studies for genetic variants at positions between 130.3 to 130.5 mega-base on chromosome 7q32.2 for waist circumference.

**Supplementary Figure 7.** Regional association studies for genetic variants at positions between 130.3 to 130.5 mega-base on chromosome 7q32.2 for a body-shape index.

**Supplementary Figure 8.** Regional association studies for genetic variants at positions between 130.3 to 130.5 mega-base on chromosome 7q32.2 for hip circumference.

**Supplementary Figure 9.** Regional association studies for genetic variants at positions between 130.3 to 130.5 mega-base on chromosome 7q32.2 for hip index.

**Supplementary Figure 10.** Regional association studies for genetic variants at positions between 130.3 to 130.5 mega-base on chromosome 7q32.2 for body fat percentage.

**Supplementary Figure 11.** Linkage disequilibrium map of the *KLF14* gene upstream region for lead single-nucleotide polymorphisms of the study phenotypes

## Supplementary Methods

### *(1) Definitions of hypertension, diabetes mellitus, obesity, current smoking and metabolic syndrome*

Hypertension was defined as systolic blood pressure (BP) of  $\geq 140$  mmHg, diastolic BP of  $\geq 90$  mmHg or a self-reported history of hypertension. Diabetes mellitus (DM) was defined as a fasting plasma glucose level of  $\geq 126$  mg/dL, a glycohemoglobin value of  $\geq 6.5\%$ , or a self-reported history of DM. Obesity was defined as a BMI of  $\geq 25$  kg/m<sup>2</sup>. Current smoking was defined as regular cigarette smoking at the time of survey.

Because medication histories were unavailable, metabolic syndrome characteristics were based on the recent update of the third report of the National Cholesterol Education Program's Adult Treatment Panel III criteria (Grundy et al., 2005) with modifications. Participants with three or more of the following attributes are typically defined as having metabolic syndrome: (1) BP of  $\geq 130/85$  mmHg or a history of hypertension; (2) triglyceride level of  $\geq 150$  mg/dL; (3) high-density lipoprotein cholesterol level of  $< 40$  mg/dL for men or  $< 50$  mg/dL for women; (4) fasting plasma glucose of  $\geq 100$  mg/dL or a history of DM; and (5) waist circumference of  $> 90$  cm for men or  $> 80$  cm for women.

### **Reference:**

Grundy SM, Cleeman JI, Daniels SR, Donato KA, Eckel RH, Franklin BA, et al. Diagnosis and management of the metabolic syndrome: an American Heart Association/National Heart, Lung, and Blood Institute Scientific Statement. *Circulation*. 2005;112:2735-52.

### *(2) Measurement of body fat percentage (BFP)*

BFP was measured by "Body Composition Analyzer BC-420MA" TANITA, a device that sends a weak electric current through the body to measure the impedance (electrical resistance) of the body. After switched on the analyzer, we enter the weight of the clothes (it can be entered in the range of 0.0–10.0 kg) and then the participants stand on the electrode, barefoot, with both legs parallel to the electrodes facing the weighing scale without bending the legs. Then input the ID number, select the body type, gender, age and height of the participants. The results are printed automatically.

### *(3) Formulas for body shape indices: a body shape index (ABSI), hip index (HI) and waist hip index (WHI)*

The anthropometric measurements were converted to allometric body shape indices. The published formulas for ABSI and HI have previously been derived for participants in the National Health and Nutrition Examination Survey (NHANES) and the formula for WHI was previously reported. (Christakoudi et al., 2021)

$$\text{ABSI} = \text{WC} * \text{Weight}^{-2/3} * \text{Height}^{5/6}.$$

$$\text{HI} = \text{HC} * \text{Weight}^{-0.482} * \text{Height}^{0.310}.$$

$$\text{WHI} = \text{WHR} * [\text{Weight (kg)/Height}^2 \text{ (cm)}]^{-1/4}.$$

## Reference:

Christakoudi S, Evangelou E, Riboli E, Tsilidis KK. GWAS of allometric body-shape indices in UK Biobank identifies loci suggesting associations with morphogenesis, organogenesis, adrenal cell renewal and cancer. *Scientific reports*. 2021;11:10688.

*(4) Formulas for the product of triglyceride and fasting plasma glucose (the TyG index), TyG with adiposity status (TyG-body mass index [BMI] and TyG waist circumference)*

TyG index has been revealed to be an efficient marker for early identification of insulin resistance (Guerrero-Romero et al., 2010, Du et al., 2014). BMI and waist circumference are simple, inexpensive and noninvasive anthropometric parameters and are commonly adopted as useful indicators of obesity and other metabolic risk. A combination of obesity and TyG can potentially identify IR more strongly than other surrogate markers. Thus, we use TyG and TyG related parameters (TyG BMI and TyG WC) as surrogate markers of IR. TyG related parameters were calculated as follows: TyG index:  $\text{Ln} [\text{TG (mg/dL)} * \text{FPG (mg/dL)} / 2]$ , TyG-BMI: TyG index  $\times \text{BM}$ , TyG-WC: TyG index  $\times \text{WC}$  (Er et al., 2016).

## References:

Guerrero-Romero F, Simental-Mendia LE, Gonzalez-Ortiz M, Martinez-Abundis E, Ramos-Zavala MG, Hernandez-Gonzalez SO, et al. The product of triglycerides and glucose, a simple measure of insulin sensitivity. Comparison with the euglycemic hyperinsulinemic clamp. *The Journal of clinical endocrinology and metabolism*. 2010; 95:3347–3351.

Du T, Yuan G, Zhang M, Zhou X, Sun X, Yu X. Clinical usefulness of lipid ratios, visceral adiposity indicators, and the triglycerides and glucose index as risk markers of insulin resistance. *Cardiovascular Diabetology*. 2014;13:146.

Er LK, Wu S, Chou HH, Hsu LA, Teng MS, Sun YC, et al. Triglyceride Glucose-Body Mass Index Is a Simple and Clinically Useful Surrogate Marker for Insulin Resistance in Nondiabetic Individuals. PLoS One. 2016;11:e0149731.

**Supplementary Table 1.** Association between *KLF14* rs4731702 genotypes and body-shape indices and metabolic traits in Taiwan Biobank participants

|                                              | beta    | SE     | P value                |
|----------------------------------------------|---------|--------|------------------------|
| Age (years)                                  | 0.0186  | 0.0580 | 0.7479                 |
| Body-shape indices                           |         |        |                        |
| Body height (cm)                             | -0.0612 | 0.0298 | 0.0402                 |
| Body weight (kg)                             | -0.0438 | 0.0244 | 0.0732                 |
| Hip circumference (cm)                       | 0.1014  | 0.0205 | $7.43 \times 10^{-7}$  |
| Waist circumference (cm)                     | 0.1193  | 0.0276 | $1.5 \times 10^{-5}$   |
| Waist hip ratio                              | 0.0002  | 0.0003 | 0.4331                 |
| Body fat percentage (%)                      | 0.0511  | 0.0137 | 0.0002                 |
| Body mass index (kg/m <sup>2</sup> )         | 0.0898  | 0.0197 | $5.2 \times 10^{-6}$   |
| ABSI                                         | 0.0117  | 0.0025 | $2.15 \times 10^{-6}$  |
| WHI                                          | 0.0009  | 0.0013 | 0.4763                 |
| HI                                           | 0.0201  | 0.0027 | $1.26 \times 10^{-13}$ |
| Blood pressure and heart rate                |         |        |                        |
| Mean heart rate <sup>†</sup> (/min)          | -0.0279 | 0.0523 | 0.5937                 |
| Systolic BP <sup>†</sup> (mmHg)              | -0.3788 | 0.0833 | $5.00 \times 10^{-6}$  |
| Diastolic BP <sup>†</sup> (mmHg)             | -0.2894 | 0.0543 | $9.70 \times 10^{-8}$  |
| Mean BP <sup>†</sup> (mmHg)                  | -0.3192 | 0.0597 | $8.75 \times 10^{-8}$  |
| Lipid profiles                               |         |        |                        |
| Total cholesterol <sup>§</sup> (mmol/L)      | 0.0003  | 0.0004 | 0.5122                 |
| HDL cholesterol <sup>§</sup> (mmol/L)        | 0.0038  | 0.0005 | $6.69 \times 10^{-14}$ |
| LDL cholesterol <sup>§</sup> (mmol/L)        | -0.0003 | 0.0006 | 0.6471                 |
| Triglyceride <sup>§</sup> (mmol/L)           | -0.0093 | 0.0012 | $1.18 \times 10^{-14}$ |
| Glucose metabolism                           |         |        |                        |
| Fasting plasma glucose <sup>‡</sup> (mmol/L) | -0.2390 | 0.0824 | 0.0037                 |
| HbA1c <sup>‡</sup> (%)                       | -0.0106 | 0.0033 | 0.0013                 |
| Insulin resistance surrogate markers         |         |        |                        |
| TyG index <sup>§, ‡</sup>                    | -275.84 | 54.41  | $3.99 \times 10^{-7}$  |
| TyG-BMI <sup>§, ‡</sup> ( $\times 10^3$ )    | -6932   | 1428   | $1.00 \times 10^{-6}$  |
| TyG-WC <sup>§, ‡</sup> ( $\times 10^3$ )     | -21873  | 4940   | $1.00 \times 10^{-5}$  |
| Atherosclerotic risk factors                 |         |        |                        |
| Diabetes mellitus (%)                        | -0.0706 | 0.0199 | 0.0004                 |
| Hypertension (%)                             | -0.0581 | 0.0146 | $7.20 \times 10^{-5}$  |
| Metabolic syndrome (%)                       | -0.1089 | 0.0153 | $9.92 \times 10^{-13}$ |

Abbreviations, adjusted condition and subjects recruited for analysis as in Figure 1 and Table 2.

P: adjusted for age, sex, BMI, and current smoking; Age: adjusted for sex, BMI and current smoking; and BMI: adjusted for age, sex and smoking. <sup>†</sup> hypertension, <sup>‡</sup> diabetes mellitus, and <sup>§</sup> hyperlipidemia.

Significance was defined as a P value of  $< 0.05/(131+27) = 3.16 \times 10^{-4}$

**Supplementary Table 2.** Association between *KLF14* rs4731702 genotypes and body-shape indices and metabolic traits according to obesity status

| Clinical and laboratory parameters           | Non - obesity (n = 49,943) |        |                       | Obesity (n = 28,799) |        |                          |
|----------------------------------------------|----------------------------|--------|-----------------------|----------------------|--------|--------------------------|
|                                              | beta                       | SE     | P value               | beta                 | SE     | P value                  |
| Age (years)                                  | 0.0176                     | 0.0727 | 0.8083                | 0.0432               | 0.0935 | 0.6439                   |
| Body-shape indices                           |                            |        |                       |                      |        |                          |
| Body height (cm)                             | -0.1079                    | 0.0372 | 0.0037                | 0.0148               | 0.0497 | 0.7661                   |
| Body weight (kg)                             | -0.0785                    | 0.0268 | 0.0033                | 0.0088               | 0.0466 | 0.8497                   |
| Hip circumference (cm)                       | 0.0530                     | 0.0243 | 0.0288                | 0.1826               | 0.0368 | $7.15 \times 10^{-7*}$   |
| Waist circumference (cm)                     | 0.0160                     | 0.0336 | 0.6342                | 0.2941               | 0.0474 | $5.62 \times 10^{-10**}$ |
| Waist hip ratio                              | -0.0003                    | 0.0004 | 0.4056                | 0.0012               | 0.0005 | 0.0125                   |
| Body fat percentage (%)                      | 0.0468                     | 0.0159 | 0.0033                | 0.0707               | 0.0223 | 0.0016                   |
| Body mass index (kg/m <sup>2</sup> )         | 0.0151                     | 0.0129 | 0.2412                | 0.0693               | 0.0249 | 0.0054                   |
| ABSI                                         | 0.0041                     | 0.0032 | 0.2088                | 0.0245               | 0.0038 | $1.1 \times 10^{-10**}$  |
| WHI                                          | -0.0014                    | 0.0017 | 0.3905                | 0.0050               | 0.0020 | 0.0136                   |
| HI                                           | 0.0155                     | 0.0033 | $2.26 \times 10^{-6}$ | 0.0269               | 0.0046 | $6.36 \times 10^{-9}$    |
| Blood pressure and heart rate                |                            |        |                       |                      |        |                          |
| Mean heart rate <sup>†</sup> (/min)          | 0.0998                     | 0.0635 | 0.1161                | -0.2897              | 0.0916 | 0.0016**                 |
| Systolic BP <sup>†</sup> (mmHg)              | -0.3109                    | 0.1005 | 0.0020                | -0.5082              | 0.1481 | $6.02 \times 10^{-4}$    |
| Diastolic BP <sup>†</sup> (mmHg)             | -0.2287                    | 0.0651 | $4.42 \times 10^{-4}$ | -0.4123              | 0.0976 | $2.40 \times 10^{-5}$    |
| Mean BP <sup>†</sup> (mmHg)                  | -0.2561                    | 0.0717 | $3.57 \times 10^{-4}$ | -0.4443              | 0.1068 | $3.20 \times 10^{-5}$    |
| Lipid profiles                               |                            |        |                       |                      |        |                          |
| Total cholesterol <sup>§</sup> (mmol/L)      | 0.0005                     | 0.0005 | 0.3761                | -0.0001              | 0.0007 | 0.9367                   |
| HDL cholesterol <sup>§</sup> (mmol/L)        | 0.0033                     | 0.0006 | $3.25 \times 10^{-7}$ | 0.0048               | 0.0008 | $1.01 \times 10^{-8}$    |
| LDL cholesterol <sup>§</sup> (mmol/L)        | -0.0002                    | 0.0008 | 0.7853                | -0.0004              | 0.0011 | 0.7096                   |
| Triglyceride <sup>§</sup> (mmol/L)           | -0.0078                    | 0.0014 | $5.23 \times 10^{-8}$ | -0.0119              | 0.0021 | $2.22 \times 10^{-8}$    |
| Glucose metabolism                           |                            |        |                       |                      |        |                          |
| Fasting plasma glucose <sup>‡</sup> (mmol/L) | -0.1275                    | 0.0870 | 0.1429                | -0.4367              | 0.1695 | 0.0100                   |
| HbA1c <sup>‡</sup> (%)                       | -0.0069                    | 0.0035 | 0.0505                | -0.0172              | 0.0066 | 0.0092                   |
| Insulin resistance surrogate markers         |                            |        |                       |                      |        |                          |
| TyG <sup>§, †</sup>                          | -218.40                    | 55.05  | $7.30 \times 10^{-5}$ | -385.54              | 116.95 | 0.0010                   |
| TyG-BMI <sup>§, †</sup> ( $\times 10^3$ )    | -4907                      | 1266   | $1.06 \times 10^{-4}$ | -10842               | 3331   | 0.0011                   |
| TyG-WC <sup>§, †</sup> ( $\times 10^3$ )     | -17,044                    | 4663   | $2.57 \times 10^{-4}$ | -31,323              | 11133  | 0.0049                   |
| Atherosclerotic risk factors                 |                            |        |                       |                      |        |                          |
| Diabetes mellitus (%)                        | -0.0759                    | 0.0306 | 0.0133                | -0.0650              | 0.0260 | 0.0123                   |
| Hypertension (%)                             | -0.0606                    | 0.0208 | 0.0036                | -0.0538              | 0.0205 | 0.0086                   |
| Metabolic syndrome (%)                       | -0.0952                    | 0.0250 | $1.41 \times 10^{-4}$ | -0.1140              | 0.0192 | $2.80 \times 10^{-9}$    |

Abbreviations, adjusted condition and subjects recruited for analysis as in Figure 1 and Table 2.

P: adjusted for age, sex, BMI and current smoking and age: adjusted for sex, BMI and current smoking. <sup>†</sup> hypertension, <sup>‡</sup> diabetes mellitus, and <sup>§</sup> hyperlipidemia.

Significance was defined as a P value of  $< 0.05/(131+27) = 3.16 \times 10^{-4}$

t-test : \*\* P < 0.001, \* P < 0.01

**Supplementary Table 3.** Association between *KLF14* rs4731702 genotypes and body-shape indices and metabolic traits according to obesity in male

| Clinical and laboratory parameters           | Male, Non-obese (n = 14,266) |        |          | Male, Obese (n = 14,217) |        |          |
|----------------------------------------------|------------------------------|--------|----------|--------------------------|--------|----------|
|                                              | beta                         | SE     | P value* | beta                     | SE     | P value* |
| Age (years)                                  | 0.0536                       | 0.1453 | 0.7121   | -0.0547                  | 0.1366 | 0.6886   |
| Body-shape indices                           |                              |        |          |                          |        |          |
| Body height (cm)                             | -0.0769                      | 0.0747 | 0.3036   | 0.0804                   | 0.0735 | 0.2740   |
| Body weight (kg)                             | -0.0636                      | 0.0575 | 0.2687   | 0.0792                   | 0.0707 | 0.2626   |
| Hip circumference (cm)                       | -0.0241                      | 0.0439 | 0.5834   | 0.0573                   | 0.0486 | 0.2384   |
| Waist circumference (cm)                     | -0.0659                      | 0.0545 | 0.2264   | 0.1229                   | 0.0572 | 0.0319   |
| Waist hip ratio                              | -0.0005                      | 0.0005 | 0.3765   | 0.0006                   | 0.0005 | 0.2421   |
| Body fat percentage (%)                      | 0.0564                       | 0.0355 | 0.1120   | 0.0325                   | 0.0345 | 0.3473   |
| Body mass index (kg/m <sup>2</sup> )         | -0.0027                      | 0.0223 | 0.9051   | 0.0259                   | 0.0338 | 0.4435   |
| ABSI                                         | -0.0047                      | 0.0048 | 0.3265   | 0.0074                   | 0.0043 | 0.0852   |
| WHI                                          | -0.0023                      | 0.0025 | 0.3602   | 0.0026                   | 0.0024 | 0.2686   |
| HI                                           | 0.0008                       | 0.0056 | 0.8839   | 0.0033                   | 0.0058 | 0.5730   |
| Blood pressure and heart rate                |                              |        |          |                          |        |          |
| Mean heart rate <sup>†</sup> (/min)          | 0.0610                       | 0.1307 | 0.6409   | -0.2846                  | 0.1383 | 0.0396   |
| Systolic BP <sup>†</sup> (mmHg)              | -0.3446                      | 0.1912 | 0.0715   | -0.4900                  | 0.2091 | 0.0191   |
| Diastolic BP <sup>†</sup> (mmHg)             | -0.2766                      | 0.1266 | 0.0289   | -0.4147                  | 0.1437 | 0.0039   |
| Mean BP <sup>†</sup> (mmHg)                  | -0.2993                      | 0.1372 | 0.0291   | -0.4398                  | 0.1545 | 0.0044   |
| Lipid profiles                               |                              |        |          |                          |        |          |
| Total cholesterol <sup>§</sup> (mmol/L)      | 0.0001                       | 0.0010 | 0.9380   | -0.0002                  | 0.0010 | 0.8117   |
| HDL cholesterol <sup>§</sup> (mmol/L)        | -0.0017                      | 0.0012 | 0.1600   | 0.0024                   | 0.0012 | 0.0410   |
| LDL cholesterol <sup>§</sup> (mmol/L)        | 0.0014                       | 0.0015 | 0.3691   | -0.0007                  | 0.0015 | 0.6417   |
| Triglyceride <sup>§</sup> (mmol/L)           | 0.0006                       | 0.0029 | 0.8313   | -0.0072                  | 0.0031 | 0.0211   |
| Glucose metabolism                           |                              |        |          |                          |        |          |
| Fasting plasma glucose <sup>‡</sup> (mmol/L) | 0.0240                       | 0.1913 | 0.9001   | -0.2691                  | 0.2518 | 0.2852   |
| HbA1c <sup>‡</sup> (%)                       | 0.0014                       | 0.0080 | 0.8641   | -0.0137                  | 0.0097 | 0.1578   |
| Insulin resistance surrogate markers         |                              |        |          |                          |        |          |
| TyG <sup>§, ‡</sup>                          | -106.08                      | 135.62 | 0.4341   | -237.72                  | 195.68 | 0.2244   |
| TyG-BMI <sup>§, ‡</sup> ( $\times 10^3$ )    | -2575                        | 3120   | 0.4093   | -6915                    | 5561   | 0.2137   |
| TyG-WC <sup>§, ‡</sup> ( $\times 10^3$ )     | -10,104                      | 11508  | 0.3800   | -20479                   | 18,886 | 0.2782   |
| Atherosclerotic risk factors                 |                              |        |          |                          |        |          |
| Diabetes mellitus (%)                        | -0.0302                      | 0.0483 | 0.5310   | -0.0402                  | 0.0368 | 0.2750   |
| Hypertension (%)                             | -0.0534                      | 0.0336 | 0.1124   | -0.0757                  | 0.0282 | 0.0073   |
| Metabolic syndrome (%)                       | -0.0148                      | 0.0470 | 0.7535   | -0.0819                  | 0.0276 | 0.0030   |

Abbreviations, adjusted condition and subjects recruited for analysis as in Figure 1 and Table 2.

P\*: adjusted for age, BMI, and current smoking; Age: adjusted for BMI and current smoking; and BMI: adjusted for age and smoking. <sup>†</sup> hypertension, <sup>‡</sup> diabetes mellitus, and <sup>§</sup> hyperlipidemia.

Significance was defined as a P value of  $< 0.05/(131+27) = 3.16 \times 10^{-4}$



**Supplementary Table 4.** Association between *KLF14* DNA methylation levels and *KLF14* variants and age

| IlmnID     | Base position | UCSC_RefGene_Name | UCSC_RefGene_Group            | Relation_to_UCS<br>C_CpG_Island | $\beta$ values of DNA methylation<br>levels# | P values               |                        |                        |                       |                         |                         |                         |
|------------|---------------|-------------------|-------------------------------|---------------------------------|----------------------------------------------|------------------------|------------------------|------------------------|-----------------------|-------------------------|-------------------------|-------------------------|
|            |               |                   |                               |                                 |                                              | rs3996352<br>genotypes | rs1364422<br>genotypes | rs4731702<br>genotypes | rs972283<br>genotypes | Age*                    | Age**                   | Age***                  |
| cg14788130 | 130380731     | <i>KLF14</i>      |                               |                                 | 0.8857 (0.8774 - 0.8949)                     | 0.261                  | 0.8339                 | 0.1262                 | 0.5212                | 0.0462                  | 0.0169                  | 0.5952                  |
| cg15769180 | 130391882     | <i>KLF14</i>      |                               |                                 | 0.8254 (0.8068 - 0.8441)                     | 0.5455                 | 0.4525                 | 0.5219                 | 0.2336                | $1.29 \times 10^{-42}$  | $5.59 \times 10^{-15}$  | $1.17 \times 10^{-30}$  |
| cg16271549 | 130406947     | <i>KLF14</i>      |                               |                                 | 0.2351 (0.2114 - 0.2604)                     | 0.2294                 | 0.3614                 | 0.3184                 | 0.5106                | 0.6924                  | 0.622                   | 0.9289                  |
| cg19027884 | 130414263     | <i>KLF14</i>      |                               | N-Shelf                         | 0.6517 (0.6276 - 0.6756)                     | 0.2402                 | 0.9017                 | 0.3096                 | 0.2383                | $3.60 \times 10^{-8}$   | 0.0007                  | $1.11 \times 10^{-5}$   |
| cg03578375 | 130417085     | <i>KLF14</i>      |                               | N-Shore                         | 0.8960 (0.8838 - 0.9076)                     | 0.9435                 | 0.2751                 | 0.91                   | 0.7339                | 0.0274                  | 0.0458                  | 0.2576                  |
| cg23399222 | 130417715     | <i>KLF14</i>      | 1 <sup>st</sup><br>Exon;3'UTR | N-Shore                         | 0.8099 (0.7900 - 0.8289)                     | 0.2847                 | 0.9051                 | 0.3426                 | 0.7956                | 0.1301                  | 0.2178                  | 0.3626                  |
| cg04528819 | 130418315     | <i>KLF14</i>      | 1 <sup>st</sup> Exon          | Island                          | 0.1764 (0.1571 - 0.1954)                     | 0.4777                 | 0.8799                 | 0.5894                 | 0.7377                | $8.47 \times 10^{-119}$ | $5.07 \times 10^{-63}$  | $1.78 \times 10^{-59}$  |
| cg20426994 | 130418324     | <i>KLF14</i>      | 1 <sup>st</sup> Exon          | Island                          | 0.1140 (0.0959 - 0.1341)                     | 0.1787                 | 0.6853                 | 0.1912                 | 0.1406                | $2.08 \times 10^{-111}$ | $3.33 \times 10^{-59}$  | $3.14 \times 10^{-55}$  |
| cg00094518 | 130418549     | <i>KLF14</i>      | 1 <sup>st</sup> Exon          | Island                          | 0.1936 (0.1624 - 0.2283)                     | 0.7445                 | 0.406                  | 0.7645                 | 0.663                 | $4.15 \times 10^{-141}$ | $4.19 \times 10^{-77}$  | $5.20 \times 10^{-70}$  |
| cg09823095 | 130419042     | <i>KLF14</i>      | TSS200                        | Island                          | 0.0197 (0.0150 - 0.0249)                     | 0.3876                 | 0.1777                 | 0.4113                 | 0.6812                | $2.26 \times 10^{-17}$  | $1.25 \times 10^{-10}$  | $1.44 \times 10^{-8}$   |
| cg25109431 | 130419057     | <i>KLF14</i>      | TSS200                        | Island                          | 0.0186 (0.0146 - 0.0226)                     | 0.8381                 | 0.4882                 | 0.8799                 | 0.4485                | $8.09 \times 10^{-7}$   | 0.0061                  | $2.68 \times 10^{-5}$   |
| cg21449170 | 130419062     | <i>KLF14</i>      | TSS200                        | Island                          | 0.0567 (0.0485 - 0.0661)                     | 0.4869                 | 0.7431                 | 0.4766                 | 0.4567                | $3.69 \times 10^{-30}$  | $1.87 \times 10^{-16}$  | $8.18 \times 10^{-16}$  |
| cg05651960 | 130419064     | <i>KLF14</i>      | TSS200                        | Island                          | 0.0533 (0.0461 - 0.0617)                     | 0.1841                 | 0.0326                 | 0.3231                 | 0.1074                | $7.98 \times 10^{-12}$  | $4.87 \times 10^{-8}$   | $1.96 \times 10^{-5}$   |
| cg18751682 | 130419066     | <i>KLF14</i>      | TSS200                        | Island                          | 0.0471 (0.0397 - 0.0558)                     | 0.7911                 | 0.7577                 | 0.8534                 | 0.9897                | $9.20 \times 10^{-25}$  | $1.11 \times 10^{-16}$  | $4.32 \times 10^{-10}$  |
| cg08097417 | 130419133     | <i>KLF14</i>      | TSS1500                       | Island                          | 0.1741(0.1492 - 0.1998)                      | 0.5339                 | 0.2318                 | 0.6571                 | 0.416                 | $3.83 \times 10^{-253}$ | $9.28 \times 10^{-135}$ | $2.97 \times 10^{-127}$ |

|                |           |              |         |         |                          |        |        |        |        |                         |                        |                        |
|----------------|-----------|--------------|---------|---------|--------------------------|--------|--------|--------|--------|-------------------------|------------------------|------------------------|
| cg0795599<br>5 | 130419159 | <i>KLF14</i> | TSS1500 | Island  | 0.0573 (0.0434 - 0.0749) | 0.9929 | 0.0835 | 0.967  | 0.6541 | $4.20 \times 10^{-153}$ | $9.22 \times 10^{-78}$ | $6.92 \times 10^{-79}$ |
| cg2228587<br>8 | 130419173 | <i>KLF14</i> | TSS1500 | Island  | 0.0655 (0.0533 - 0.0793) | 0.6426 | 0.197  | 0.7456 | 0.6767 | $8.16 \times 10^{-59}$  | $3.62 \times 10^{-38}$ | $9.58 \times 10^{-24}$ |
| cg2152093<br>3 | 130419340 | <i>KLF14</i> | TSS1500 | Island  | 0.1203 (0.0903 - 0.1630) | 0.4646 | 0.0512 | 0.3312 | 0.2751 | 0.0853                  | 0.1357                 | 0.3602                 |
| cg0653362<br>9 | 130419370 | <i>KLF14</i> | TSS1500 | Island  | 0.1239 (0.1039 - 0.1449) | 0.0469 | 0.4193 | 0.0325 | 0.3854 | $3.77 \times 10^{-8}$   | $8.07 \times 10^{-6}$  | 0.0009                 |
| cg0871971<br>2 | 130419485 | <i>KLF14</i> | TSS1500 | S-Shore | 0.1294 (0.1129 - 0.1481) | 0.0745 | 0.1835 | 0.0501 | 0.1083 | $5.64 \times 10^{-38}$  | $7.58 \times 10^{-18}$ | $2.66 \times 10^{-22}$ |
| cg0277824<br>5 | 130419514 | <i>KLF14</i> | TSS1500 | S-Shore | 0.0917 (0.0790 - 0.1050) | 0.7298 | 0.6379 | 0.7621 | 0.3155 | $3.21 \times 10^{-10}$  | $1.26 \times 10^{-5}$  | $5.89 \times 10^{-6}$  |
| cg1864529<br>7 | 130419594 | <i>KLF14</i> | TSS1500 | S-Shore | 0.0840 (0.0663 - 0.1049) | 0.4737 | 0.6493 | 0.4825 | 0.2474 | 0.1704                  | 0.1351                 | 0.6828                 |
| cg1731702<br>3 | 130419614 | <i>KLF14</i> | TSS1500 | S-Shore | 0.0907 (0.0766 - 0.1058) | 0.1595 | 0.1022 | 0.265  | 0.443  | $1.07 \times 10^{-16}$  | $4.87 \times 10^{-9}$  | $4.61 \times 10^{-9}$  |
| cg0603865<br>5 | 130419675 | <i>KLF14</i> | TSS1500 | S-Shore | 0.2058 (0.1725 - 0.2428) | 0.715  | 0.1339 | 0.6919 | 0.8807 | $3.21 \times 10^{-7}$   | $1.82 \times 10^{-5}$  | 0.0035                 |
| cg0391491<br>3 | 130419754 | <i>KLF14</i> | TSS1500 | S-Shore | 0.0834 (0.0676 - 0.1024) | 0.6374 | 0.7033 | 0.5772 | 0.5944 | 0.319                   | 0.3018                 | 0.6847                 |
| cg0952913<br>8 | 130419792 | <i>KLF14</i> | TSS1500 | S-Shore | 0.1487 (0.1258 - 0.1742) | 0.1558 | 0.3704 | 0.1097 | 0.4827 | 0.2065                  | 0.4608                 | 0.2943                 |
| cg0242304<br>4 | 130419932 | <i>KLF14</i> | TSS1500 | S-Shore | 0.2096 (0.1785 - 0.2467) | 0.9079 | 0.1863 | 0.9502 | 0.6601 | 0.371                   | 0.3216                 | 0.7843                 |
| cg0238511<br>0 | 130421878 | <i>KLF14</i> |         | S-Shelf | 0.7276 (0.7001 - 0.7568) | 0.2608 | 0.372  | 0.2758 | 0.2378 | 0.127                   | 0.1431                 | 0.4641                 |
| cg2404277<br>2 | 130478741 | <i>KLF14</i> |         |         | 0.8602 (0.8468 - 0.8719) | 0.4067 | 0.9123 | 0.4398 | 0.1147 | $8.09 \times 10^{-12}$  | $2.48 \times 10^{-5}$  | $4.49 \times 10^{-8}$  |
| cg0886792<br>3 | 130499719 | <i>KLF14</i> |         |         | 0.5786 (0.5495 - 0.6069) | 0.2891 | 0.5253 | 0.2776 | 0.6012 | $4.40 \times 10^{-8}$   | $4.49 \times 10^{-5}$  | $7.94 \times 10^{-5}$  |
| cg2063172<br>0 | 130507724 | <i>KLF14</i> |         |         | 0.2264 (0.1892 - 0.2658) | 0.838  | 0.3898 | 0.8495 | 0.5819 | $5.78 \times 10^{-19}$  | $7.88 \times 10^{-5}$  | $3.40 \times 10^{-19}$ |
| cg2078981<br>9 | 130516373 | <i>KLF14</i> |         |         | 0.1511 (0.1283 - 0.1732) | 0.4298 | 0.3613 | 0.4675 | 0.3296 | $1.07 \times 10^{-104}$ | $2.40 \times 10^{-46}$ | $1.10 \times 10^{-60}$ |

The UCSC\_RefGene\_Name, UCSC\_RefGene\_Group, Relation\_to\_UCSC\_CpG\_Island, and Regulatory\_Feature\_Group are derived from the UCSC (University of California Santa Cruz) database.  
<https://genome.ucsc.edu/>

\* *P* value for age using total population for analysis

\*\* *P* value for age using female participants for analysis  
\*\*\* *P* value for age using female participants for analysis  
# Median (interquartile range)

**Supplementary Table 5.** Association of the cg08097417 methylation status with body-shape indices and metabolic traits according to sex

| Clinical and laboratory parameters           | Male (n = 762)        |                       |                         |                 | Female (n = 874)      |                       |                         |                 |
|----------------------------------------------|-----------------------|-----------------------|-------------------------|-----------------|-----------------------|-----------------------|-------------------------|-----------------|
|                                              | beta                  | SE                    | <i>P</i> value**        | <i>P</i> value* | beta                  | SE                    | <i>P</i> value**        | <i>P</i> value* |
| Age (years)                                  | 0.0154                | 0.0005                | $6.84 \times 10^{-124}$ | -               | 0.0153                | 0.0006                | $3.15 \times 10^{-119}$ | -               |
| Body-shape indices                           |                       |                       |                         |                 |                       |                       |                         |                 |
| Body height (cm)                             | -0.0083               | 0.0014                | $1.47 \times 10^{-9}$   | 0.7015          | -0.0088               | 0.0014                | $1.04 \times 10^{-9}$   | 0.6823          |
| Body weight (kg)                             | -0.0094               | 0.0016                | $3.96 \times 10^{-9}$   | 0.6703          | -0.0112               | 0.0019                | $5.40 \times 10^{-9}$   | 0.7139          |
| Hip circumference (cm)                       | -0.0107               | 0.0022                | $2.00 \times 10^{-6}$   | 0.1958          | -0.0102               | 0.0021                | $2.00 \times 10^{-6}$   | 0.3230          |
| Waist circumference (cm)                     | 0.0064                | 0.0018                | $3.82 \times 10^{-4}$   | 0.678           | 0.0075                | 0.0015                | $3.48 \times 10^{-7}$   | 0.6819          |
| Waist hip ratio                              | 1.3487                | 0.1783                | $1.12 \times 10^{-13}$  | 0.1667          | 1.0214                | 0.1315                | $2.30 \times 10^{-14}$  | 0.3481          |
| Body fat percentage (%)                      | 0.002                 | 0.0028                | 0.4861                  | 0.0487          | 0.0002                | 0.0036                | 0.9569                  | 0.0761          |
| Body mass index (kg/m <sup>2</sup> )         | -0.0062               | 0.0027                | 0.0198                  | 0.2756          | 0.0045                | 0.0022                | 0.0413                  | 0.5934          |
| ABSI                                         | 0.1145                | 0.0206                | $4.02 \times 10^{-8}$   | 0.716           | 0.0987                | 0.0152                | $1.26 \times 10^{-10}$  | 0.6763          |
| WHI                                          | 0.2926                | 0.0399                | $5.50 \times 10^{-13}$  | 0.1841          | 0.2187                | 0.0292                | $1.56 \times 10^{-13}$  | 0.3986          |
| HI                                           | -0.0314               | 0.0185                | 0.0891                  | 0.1123          | -0.034                | 0.0164                | 0.0382                  | 0.3566          |
| Blood pressure and heart rate                |                       |                       |                         |                 |                       |                       |                         |                 |
| Mean heart rate <sup>†</sup> (/min)          | -0.0008               | 0.0019                | 0.6855                  | 0.1633          | -0.0047               | 0.0019                | 0.0147                  | 0.5480          |
| Systolic BP <sup>†</sup> (mmHg)              | 0.0031                | 0.0006                | $3.15 \times 10^{-7}$   | 0.8515          | 0.0053                | 0.0006                | $1.45 \times 10^{-20}$  | 0.0013          |
| Diastolic BP <sup>†</sup> (mmHg)             | 0.003                 | 0.0009                | $6.05 \times 10^{-4}$   | 0.3545          | 0.0036                | 0.0009                | $9.10 \times 10^{-5}$   | 0.0886          |
| Mean BP <sup>†</sup> (mmHg)                  | 0.0037                | 0.0008                | $9.00 \times 10^{-6}$   | 0.5046          | 0.0055                | 0.0008                | $1.28 \times 10^{-11}$  | 0.0111          |
| Lipid profiles                               |                       |                       |                         |                 |                       |                       |                         |                 |
| Total cholesterol <sup>§</sup> (mmol/L)      | 0.1489                | 0.1131                | 0.1883                  | 0.1123          | 0.6792                | 0.1015                | $4.02 \times 10^{-11}$  | 0.7140          |
| HDL cholesterol <sup>§</sup> (mmol/L)        | 0.0492                | 0.0969                | 0.6119                  | 0.8618          | 0.1364                | 0.0906                | 0.1325                  | 0.8499          |
| LDL cholesterol <sup>§</sup> (mmol/L)        | 0.0056                | 0.0741                | 0.9394                  | 0.2975          | 0.3235                | 0.0676                | $2.00 \times 10^{-6}$   | 0.4901          |
| Triglyceride <sup>§</sup> (mmol/L)           | 0.0746                | 0.0395                | 0.0589                  | 0.2516          | 0.1627                | 0.0382                | $2.30 \times 10^{-5}$   | 0.5189          |
| Glucose metabolism                           |                       |                       |                         |                 |                       |                       |                         |                 |
| Fasting plasma glucose <sup>‡</sup> (mmol/L) | 0.0008                | 0.0006                | 0.156                   | 0.2471          | 0.0014                | 0.0005                | 0.0058                  | 0.5417          |
| HbA1c <sup>‡</sup> (%)                       | 0.0189                | 0.0133                | 0.1544                  | 0.1028          | 0.073                 | 0.0146                | $6.47 \times 10^{-7}$   | 0.7476          |
| Insulin resistance surrogate markers         |                       |                       |                         |                 |                       |                       |                         |                 |
| TyG <sup>§, †</sup>                          | $8.52 \times 10^{-7}$ | $7.31 \times 10^{-7}$ | 0.2443                  | 0.7013          | $3.00 \times 10^{-6}$ | $1.00 \times 10^{-6}$ | 0.0015                  | 0.4966          |
| TyG-BMI <sup>§, †</sup> ( $\times 10^3$ )    | $2.54 \times 10^{-8}$ | $2.66 \times 10^{-8}$ | 0.3398                  | 0.8221          | $1.16 \times 10^{-7}$ | $4.09 \times 10^{-8}$ | 0.0045                  | 0.4196          |
| TyG-WC <sup>§, †</sup> ( $\times 10^3$ )     | $9.44 \times 10^{-9}$ | $7.72 \times 10^{-9}$ | 0.222                   | 0.7286          | $4.05 \times 10^{-8}$ | $1.23 \times 10^{-8}$ | 0.001                   | 0.3929          |
| Atherosclerotic risk factors                 |                       |                       |                         |                 |                       |                       |                         |                 |
| Diabetes mellitus (%)                        | 1.962                 | 0.6539                | 0.0027                  | 0.7132          | 2.6383                | 0.8606                | 0.0022                  | 0.7792          |
| Hypertension (%)                             | 2.9381                | 0.42                  | $2.64 \times 10^{-12}$  | 0.016           | 3.2286                | 0.4906                | $4.67 \times 10^{-11}$  | 0.1135          |
| Metabolic syndrome (%)                       | 1.2252                | 0.4326                | 0.0046                  | 0.9084          | 1.5966                | 0.4468                | $3.53 \times 10^{-4}$   | 0.8181          |

Abbreviations, adjusted condition and subjects recruited for analysis as in Figure 1 and Table 2

<sup>†</sup> hypertension, <sup>‡</sup> diabetes mellitus, and <sup>§</sup> hyperlipidemia.

*P*\*\*<sub>1</sub>: adjusted for BMI, and current smoking and BMI: adjusted for smoking.

*P*\*<sub>1</sub>: adjusted for age, BMI, and current smoking; Age: adjusted for BMI and current smoking; and BMI: adjusted for age and smoking

Significance between cg08097417 and studied phenotypes was defined as a *P* value of  $< 0.05/(24+27) = 9.80 \times 10^{-4}$ . *t*-test: \*\* *p* < 0.001, \* *p* < 0.01.

**Supplementary Table 6.** Association of the cg08097417 methylation status with body-shape indices and metabolic traits according to obesity

| Clinical and laboratory parameters           | Non-obese (n = 1,018) |                       |                         |         | Obese (n = 618)       |                       |                         |         |
|----------------------------------------------|-----------------------|-----------------------|-------------------------|---------|-----------------------|-----------------------|-------------------------|---------|
|                                              | beta                  | SE                    | P value#                | P value | beta                  | SE                    | P value#                | P value |
| Age (years)                                  | 0.0151                | 0.0005                | $1.39 \times 10^{-140}$ | -       | 0.0155                | 0.0006                | $7.36 \times 10^{-99}$  | -       |
| Body-shape indices                           |                       |                       |                         |         |                       |                       |                         |         |
| Body height (cm)                             | -0.0096               | 0.0013                | $7.34 \times 10^{-14}$  | 0.5070  | -0.0067               | 0.0015                | $1.00 \times 10^{-5}$   | 0.9647  |
| Body weight (kg)                             | -0.0130               | 0.0017                | $1.34 \times 10^{-13}$  | 0.5870  | -0.0070               | 0.0016                | $1.50 \times 10^{-5}$   | 0.8432  |
| Hip circumference (cm)                       | -0.0113               | 0.0020                | $4.41 \times 10^{-8}$   | 0.2763  | -0.0093               | 0.0023                | $6.10 \times 10^{-5}$   | 0.2145  |
| Waist circumference (cm)                     | 0.0051                | 0.0015                | $7.19 \times 10^{-4}$   | 0.6079  | 0.0091                | 0.0017                | $1.06 \times 10^{-7}$   | 0.1031  |
| Waist hip ratio                              | 0.9151                | 0.1348                | $1.92 \times 10^{-11}$  | 0.8669  | 1.4414                | 0.1710                | $2.50 \times 10^{-16}$  | 0.0150  |
| Body fat percentage (%)                      | -0.0002               | 0.0030                | 0.9389                  | 0.6812  | -0.0008               | 0.0033                | 0.8165                  | 0.7403  |
| Body mass index (kg/m <sup>2</sup> )         | 0.0133                | 0.0040                | 0.0010                  | 0.5338  | -0.0125               | 0.0036                | $5.45 \times 10^{-4**}$ | 0.2283  |
| ABSI                                         | 0.0822                | 0.0150                | $5.72 \times 10^{-8}$   | 0.7272  | 0.1535                | 0.0207                | $4.17 \times 10^{-13*}$ | 0.0934  |
| WHI                                          | 0.1956                | 0.0293                | $3.77 \times 10^{-11}$  | 0.8869  | 0.3321                | 0.0393                | $2.29 \times 10^{-16*}$ | 0.0136  |
| HI                                           | -0.0227               | 0.0157                | 0.1466                  | 0.3989  | -0.0310               | 0.0200                | 0.1213                  | 0.1153  |
| Blood Pressure                               |                       |                       |                         |         |                       |                       |                         |         |
| Mean heart rate <sup>†</sup> (/min)          | -0.0006               | 0.0009                | 0.5217                  | 0.7655  | -0.0017               | 0.0011                | 0.1295                  | 0.7169  |
| Systolic BP <sup>†</sup> (mmHg)              | 0.0045                | 0.0005                | $3.28 \times 10^{-16}$  | 0.0244  | 0.0036                | 0.0006                | $4.30 \times 10^{-9}$   | 0.3210  |
| Diastolic BP <sup>†</sup> (mmHg)             | 0.0031                | 0.0009                | $2.82 \times 10^{-4}$   | 0.2730  | 0.0035                | 0.0009                | $1.67 \times 10^{-4}$   | 0.1010  |
| Mean BP <sup>†</sup> (mmHg)                  | 0.0047                | 0.0008                | $1.62 \times 10^{-9}$   | 0.0868  | 0.0043                | 0.0008                | $5.40 \times 10^{-7}$   | 0.1398  |
| Lipid profiles                               |                       |                       |                         |         |                       |                       |                         |         |
| Total cholesterol <sup>§</sup> (mmol/L)      | 0.4552                | 0.0975                | $3.00 \times 10^{-6}$   | 0.9026  | 0.3092                | 0.1207                | 0.0107                  | 0.0257  |
| HDL cholesterol <sup>§</sup> (mmol/L)        | 0.1224                | 0.0861                | 0.1554                  | 0.9235  | 0.0822                | 0.1017                | 0.4195                  | 0.7305  |
| LDL cholesterol <sup>§</sup> (mmol/L)        | 0.1944                | 0.0650                | 0.0029                  | 0.8831  | 0.0908                | 0.0781                | 0.2455                  | 0.0609  |
| Triglyceride <sup>§</sup> (mmol/L)           | 0.1360                | 0.0371                | $2.61 \times 10^{-4}$   | 0.8972  | 0.0772                | 0.0403                | 0.0563                  | 0.4835  |
| Glucose metabolism                           |                       |                       |                         |         |                       |                       |                         |         |
| Fasting plasma glucose <sup>‡</sup> (mmol/L) | 0.0013                | 0.0006                | 0.0255                  | 0.4838  | 0.0009                | 0.0005                | 0.0625                  | 0.8094  |
| HbA1c <sup>‡</sup> (%)                       | 0.0328                | 0.0136                | 0.0161                  | 0.0459  | 0.0509                | 0.0139                | $2.65 \times 10^{-4}$   | 0.4458  |
| Insulin resistance surrogate markers         |                       |                       |                         |         |                       |                       |                         |         |
| TyG <sup>§, ‡</sup>                          | $3.00 \times 10^{-6}$ | $1.00 \times 10^{-6}$ | 0.0095                  | 0.7942  | $1.00 \times 10^{-6}$ | $7.12 \times 10^{-7}$ | 0.1377                  | 0.4039  |
| TyG-BMI <sup>§, ‡</sup> ( $\times 10^3$ )    | $1.09 \times 10^{-7}$ | $4.41 \times 10^{-8}$ | 0.0135                  | 0.7642  | $3.58 \times 10^{-8}$ | $2.49 \times 10^{-8}$ | 0.1516                  | 0.4281  |
| TyG-WC <sup>§, ‡</sup> ( $\times 10^3$ )     | $3.66 \times 10^{-8}$ | $1.29 \times 10^{-8}$ | 0.0046                  | 0.7411  | $1.21 \times 10^{-8}$ | $7.32 \times 10^{-9}$ | 0.1004                  | 0.3715  |
| Atherosclerotic risk factors                 |                       |                       |                         |         |                       |                       |                         |         |
| Diabetes mellitus (%)                        | 2.0546                | 0.7376                | 0.0053                  | 0.5157  | 2.3726                | 0.7453                | 0.0015                  | 0.5319  |
| Hypertension (%)                             | 2.9773                | 0.4576                | $7.69 \times 10^{-11}$  | 0.0250  | 3.0894                | 0.4513                | $7.63 \times 10^{-12}$  | 0.1102  |
| Metabolic syndrome (%)                       | 1.7148                | 0.5420                | 0.0016                  | 0.9195  | 1.0864                | 0.3829                | 0.0045                  | 0.8752  |

Abbreviations, adjusted condition and subjects recruited for analysis as in Figure 1 and Table 2. *P*: adjusted for age, sex, BMI and current smoking and age: adjusted for sex, BMI and current smoking. <sup>†</sup> hypertension, <sup>‡</sup> diabetes mellitus, and <sup>§</sup> hyperlipidemia.  
*P*#: adjusted for sex, BMI, and current smoking; Age: adjusted for BMI and current smoking; and BMI: adjusted for age and smoking.  
Significance between cg08097417 and studied phenotypes was defined as a *P* value of  $< 0.05/(24+27) =$

9.80 × 10<sup>-4</sup>  
*t-test* : \*\* P < 0.001, \* P < 0.01

**Supplementary Table 7.** Association of *KLF14* rs4731702 genotypes and cg08097417 methylation status with metabolically healthy and unhealthy phenotypes in obese Taiwan

Biobank participants

| MHO vs. MUO                   |       | N      | OR   | 95%CI       | Beta  | SE   | P value                  |
|-------------------------------|-------|--------|------|-------------|-------|------|--------------------------|
| rs4731702 genotypes           | Total | 29,891 | 0.88 | 0.85 - 0.92 | -0.12 | 0.02 | 1.92 × 10 <sup>-11</sup> |
| cg08097417 methylation status | Total | 633    | 4.04 | 1.95 - 8.41 | 1.40  | 0.37 | 1.81 × 10 <sup>-4</sup>  |

MHO: metabolically healthy obese, MUO: metabolically unhealthy obese, N: number, OR odds ratio, 95% CI: 95% confidence interval, SE standard error.  
P: adjusted for age, sex, BMI and current smoking

**Supplementary Figure 1.** Regional association studies for genetic variants at positions between 130.3 and 130.5 mega-base on chromosome 7q32.2 for the high-density lipoprotein cholesterol level.

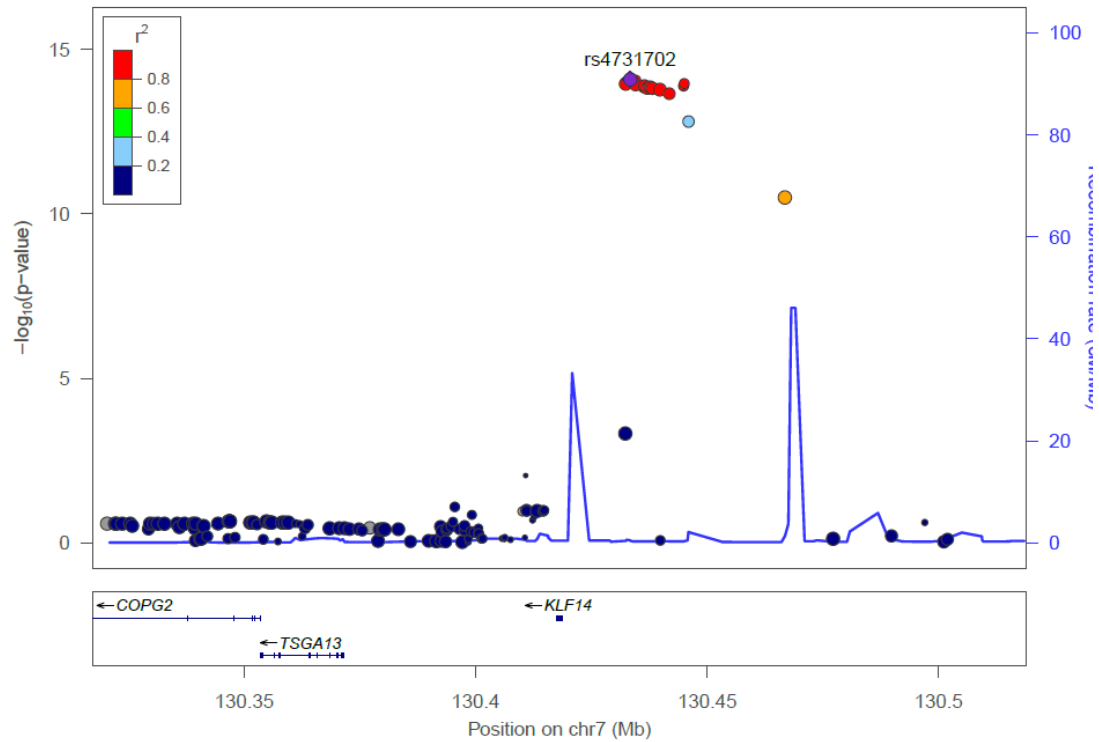

**Supplementary Figure 2.** Regional association studies for genetic variants at positions between 130.3 and 130.5 mega-base on chromosome 7q32.2 for triglyceride level.

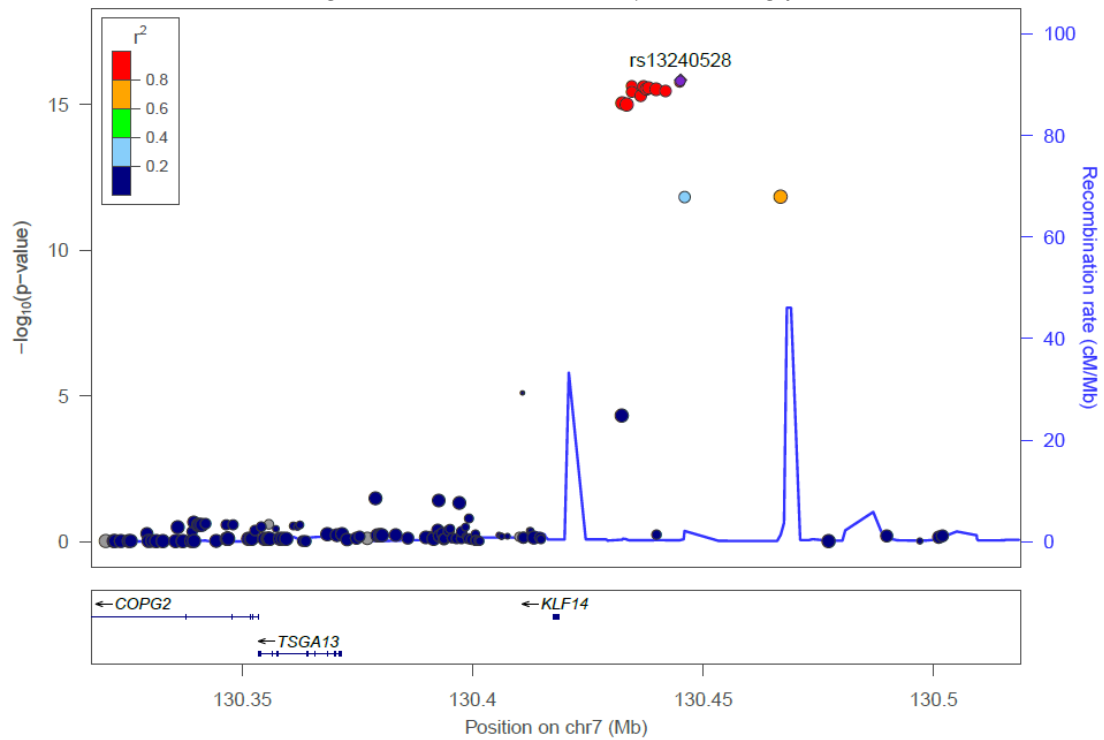

**Supplementary Figure 3.** Regional association studies for genetic variants at positions between 130.3 and 130.5 mega-base on chromosome 7q32.2 for the risk of metabolic syndrome.

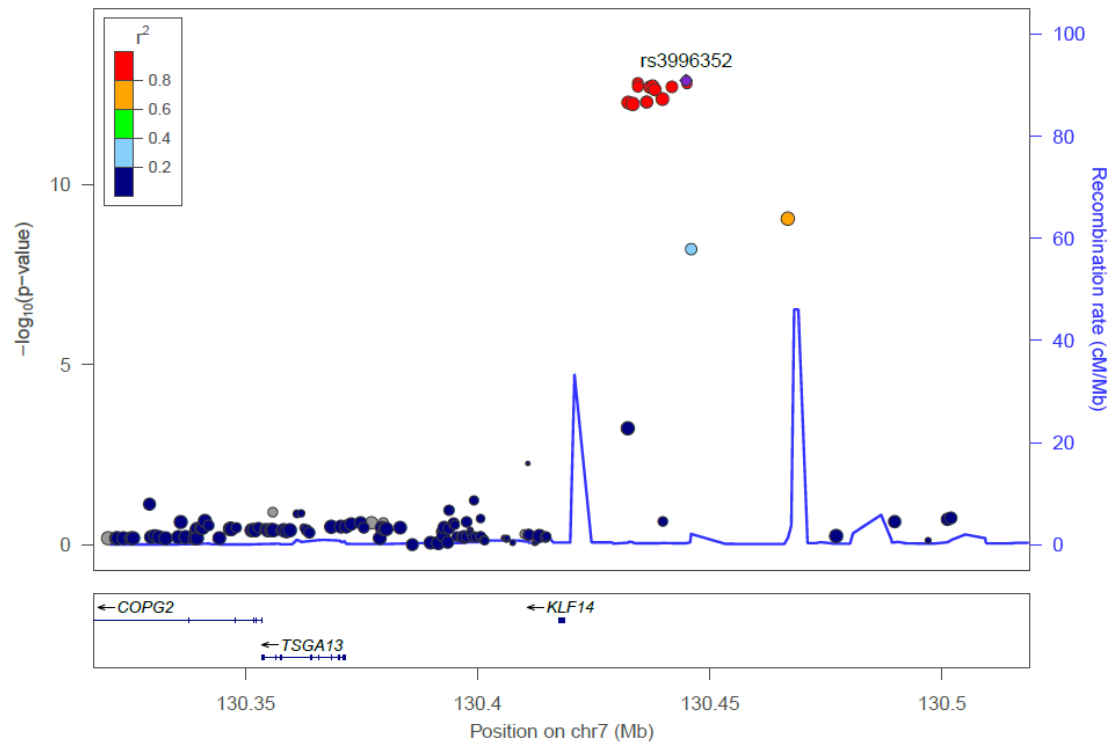

**Supplementary Figure 4.** Regional association studies for genetic variants at positions between 130.3 and 130.5 mega-base on chromosome 7q32.2 for a body-shape index.

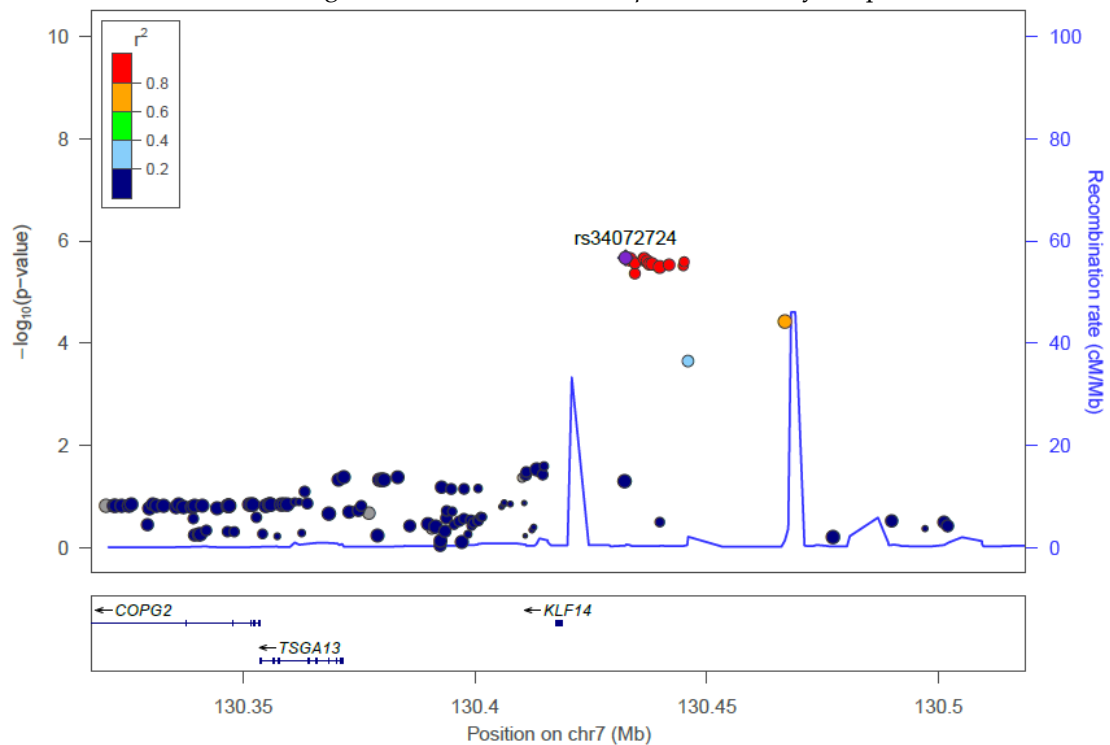



**Supplementary Figure 5.** Regional association studies for genetic variants at positions between 130.3 and 130.5 mega-base on chromosome 7q32.2 for body fat percentage.

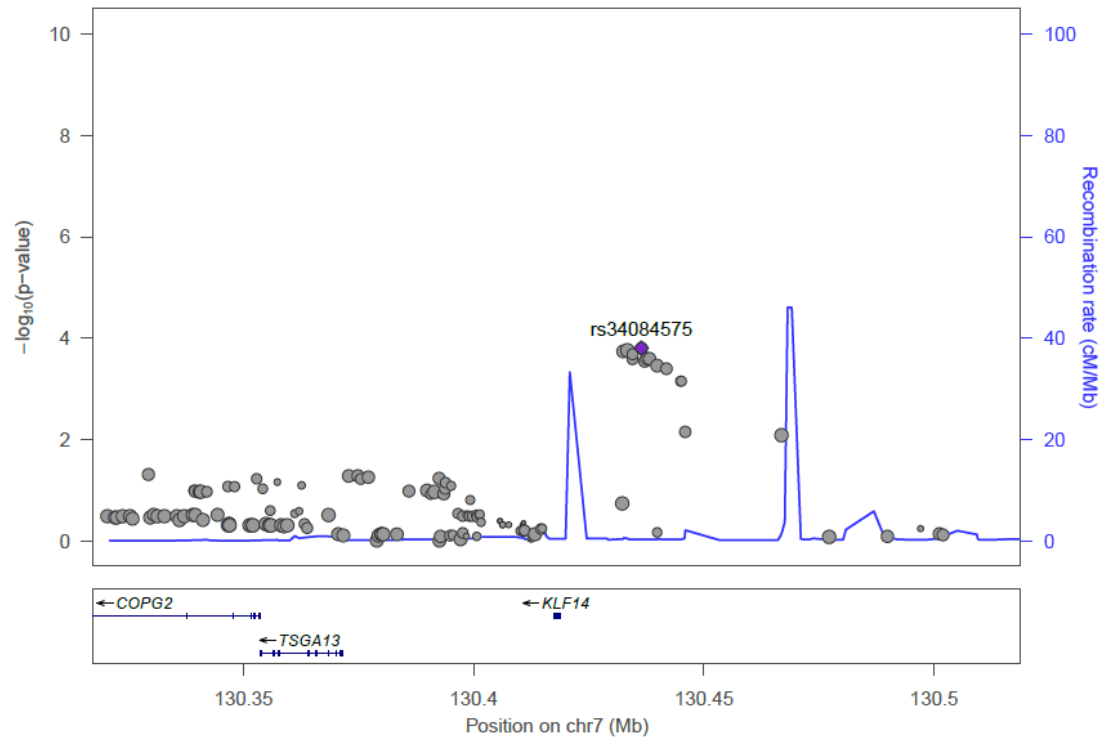

**Supplementary Figure 6.** Regional association studies for genetic variants at positions between 130.3 and 130.5 mega-base on chromosome 7q32.2 for body mass index.

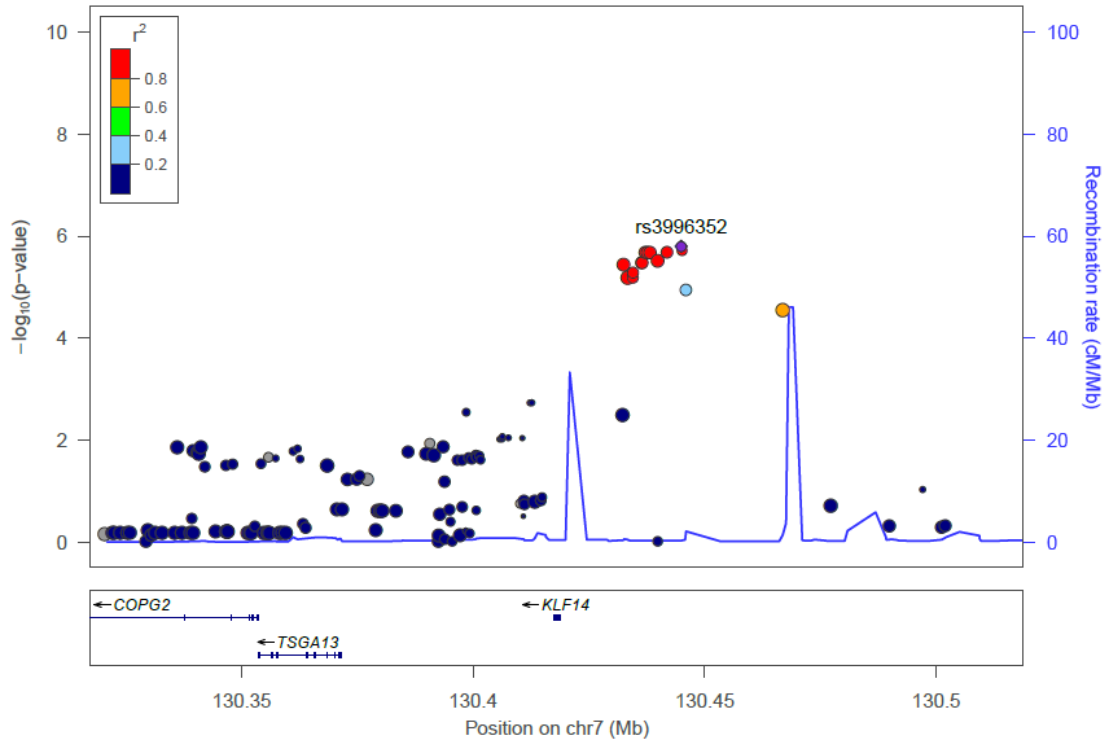

**Supplementary Figure 7.** Regional association studies for genetic variants at positions between 130.3 and 130.5 mega-base on chromosome 7q32.2 for hip circumference.

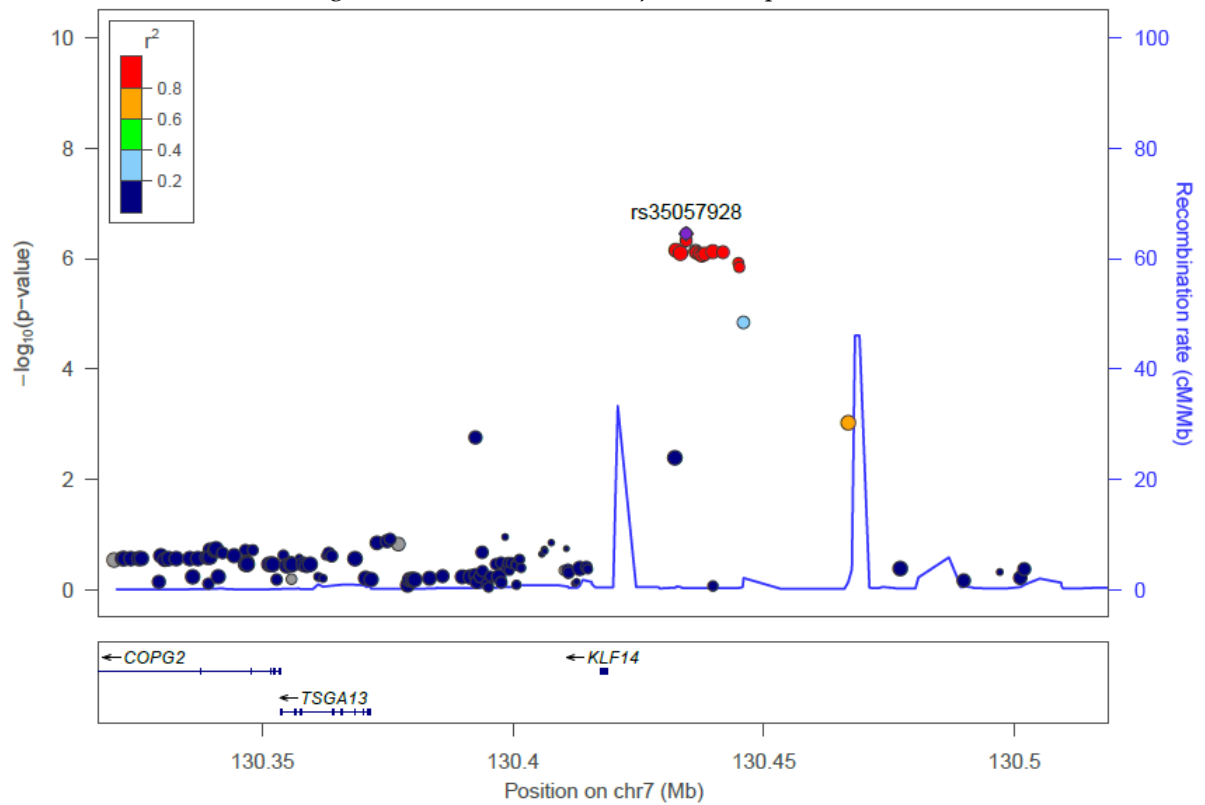

**Supplementary Figure 8.** Regional association studies for genetic variants at positions between 130.3 and 130.5 mega-base on chromosome 7q32.2 for hip index.

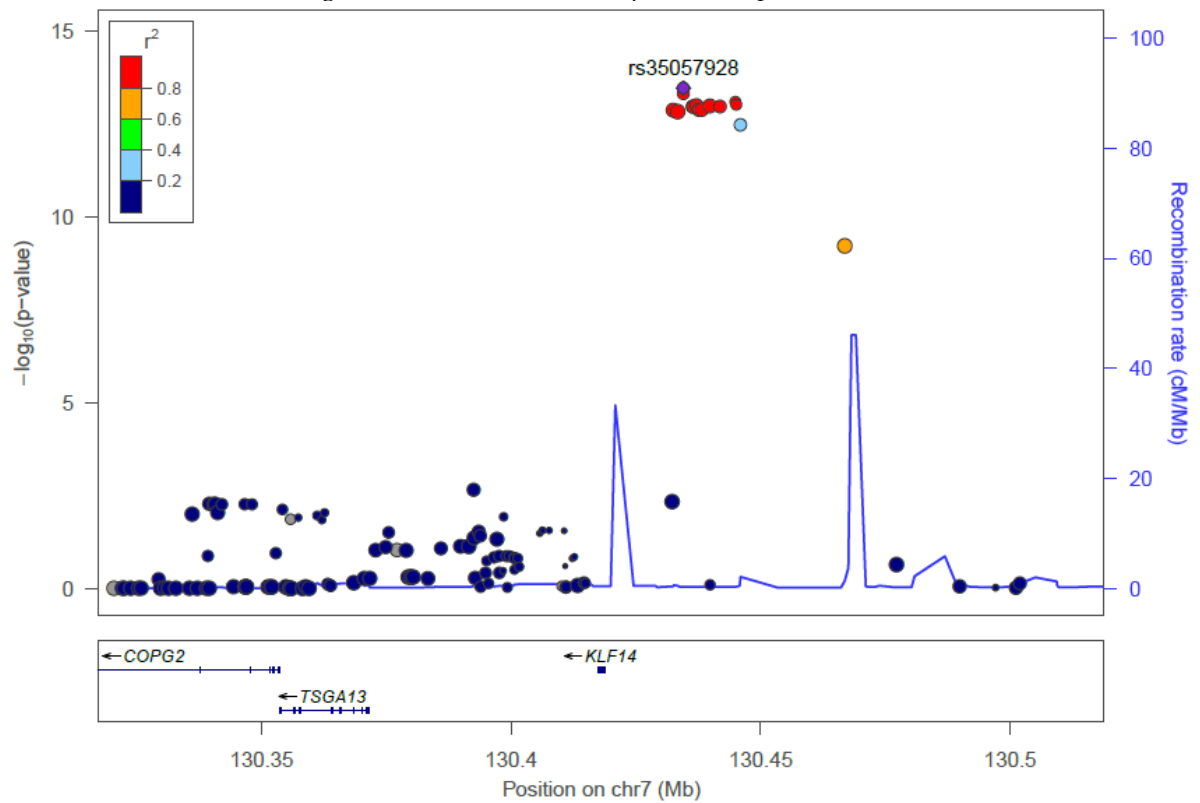

**Supplementary Figure 9.** Regional association studies for genetic variants at positions between 130.3 and 130.5 mega-base on chromosome 7q32.2 for mean blood pressure.

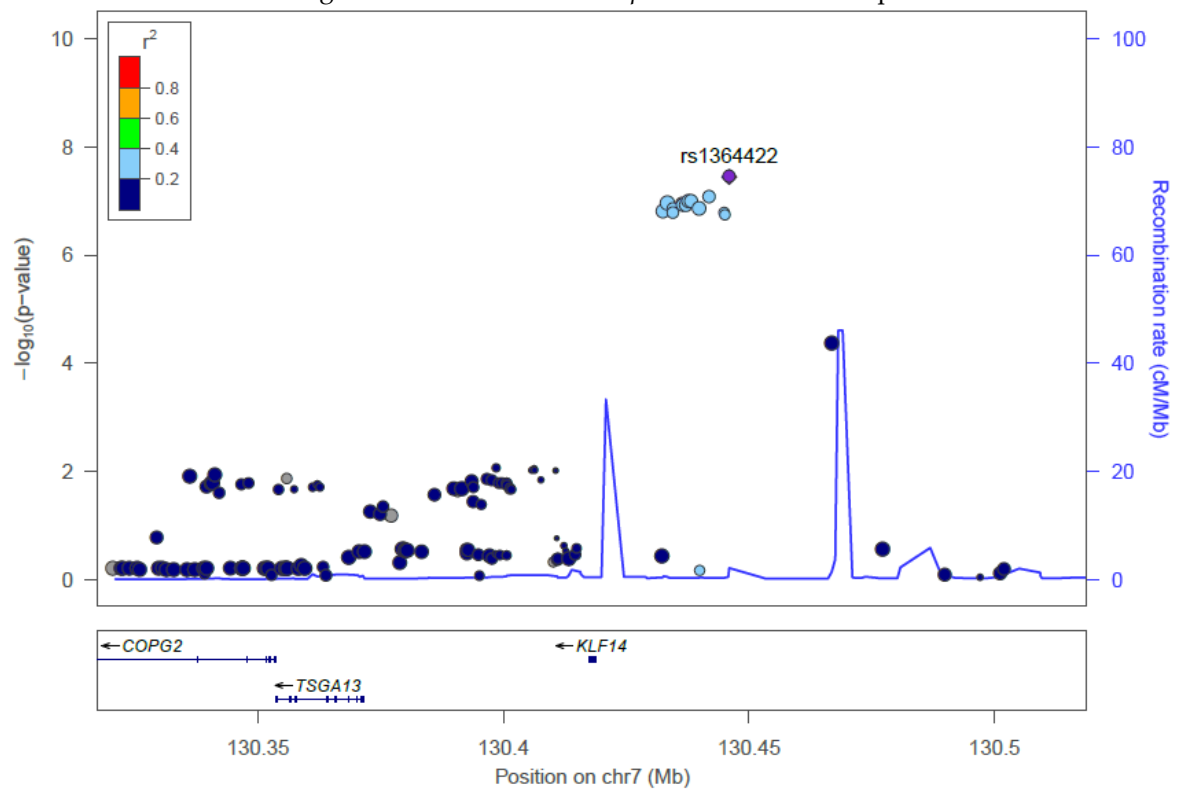

**Supplementary Figure 10.** Regional association studies for genetic variants at positions between 130.3 and 130.5 mega-base on chromosome 7q32.2 for waist circumference.

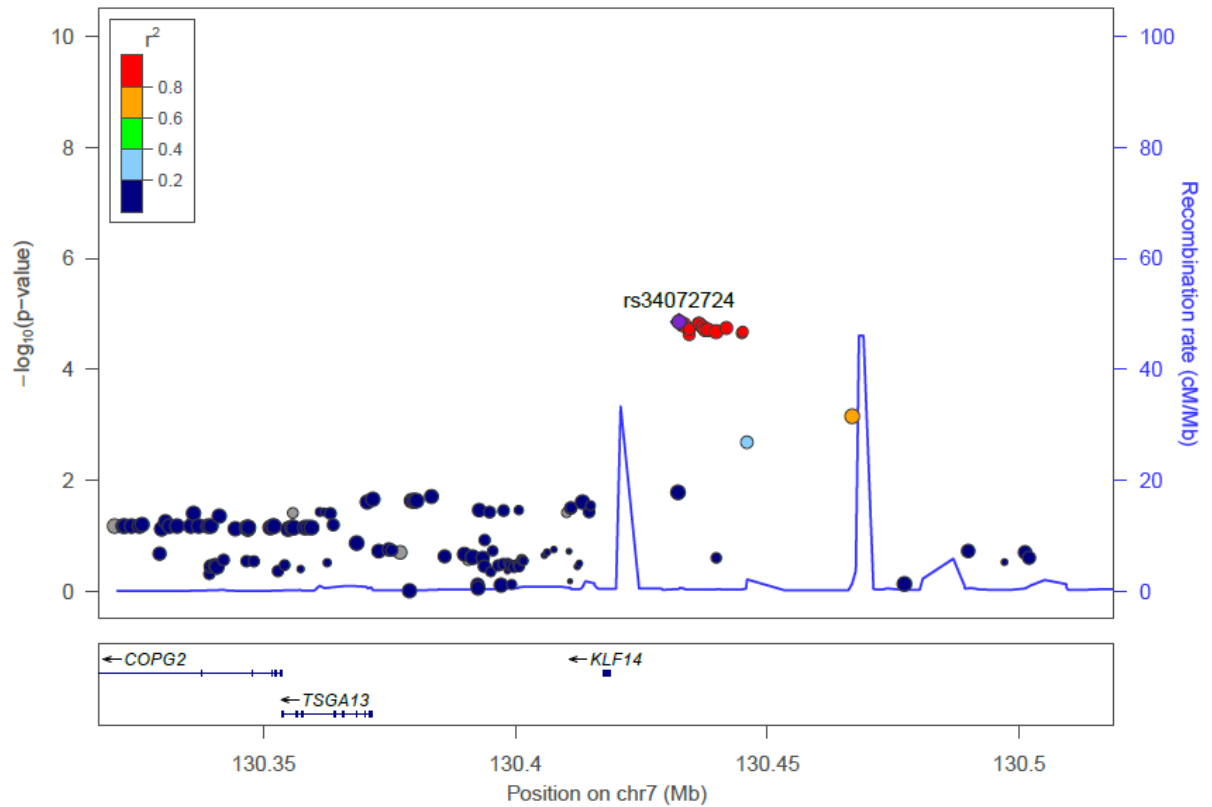

**Supplementary Figure 11.** Linkage disequilibrium map of the *KLF14* gene upstream region for lead single-nucleotide polymorphisms of the study phenotypes.

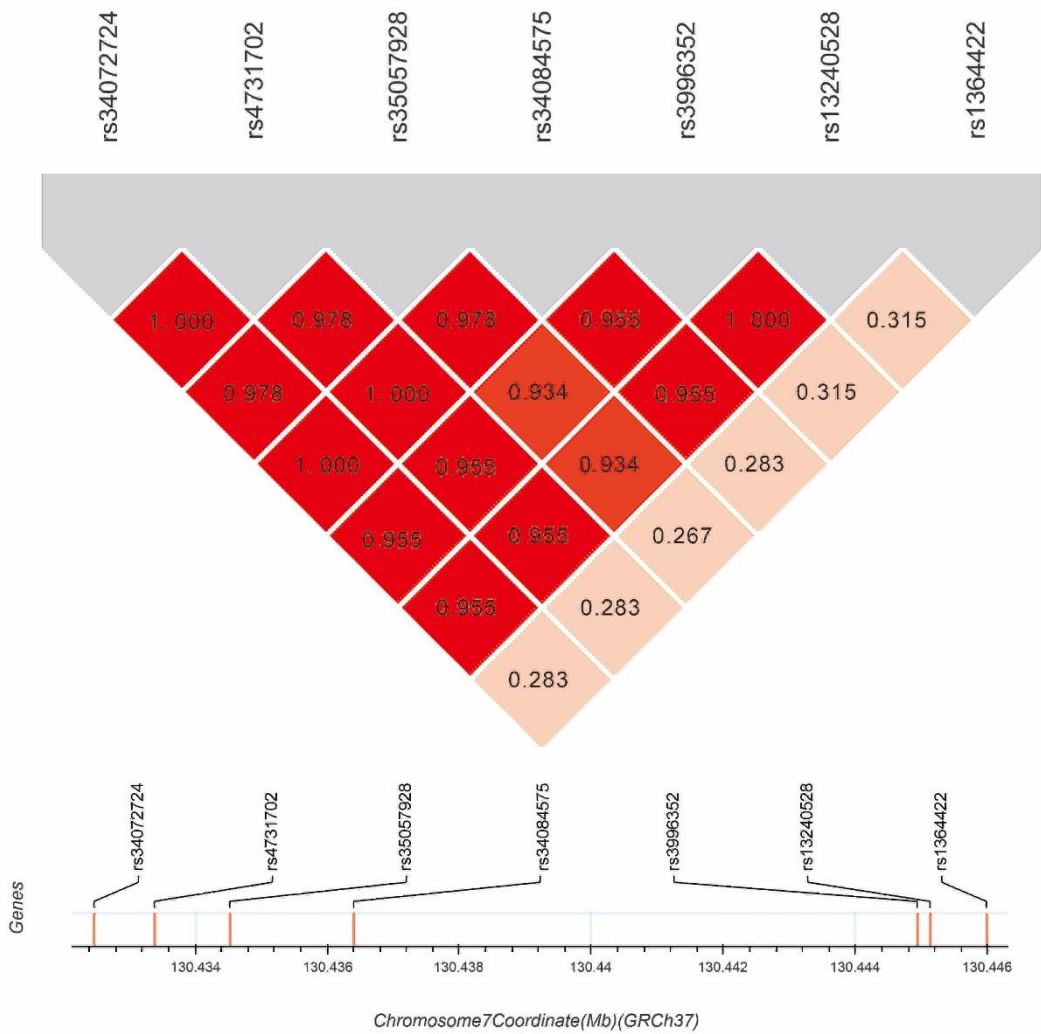

Supplement: s1 [file s1]
